# Supplementary material
Source: Springer Nature journal article supplement (https://www.springermedizin.de/resource/supplementary/12879_2007_598_MOESM1_ESM.pdf/9449448)

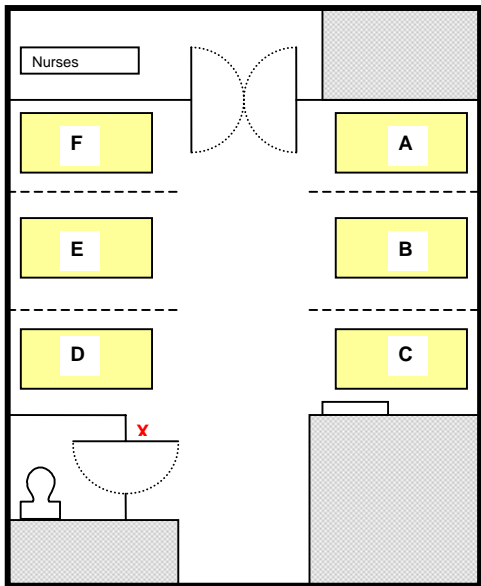

**a**

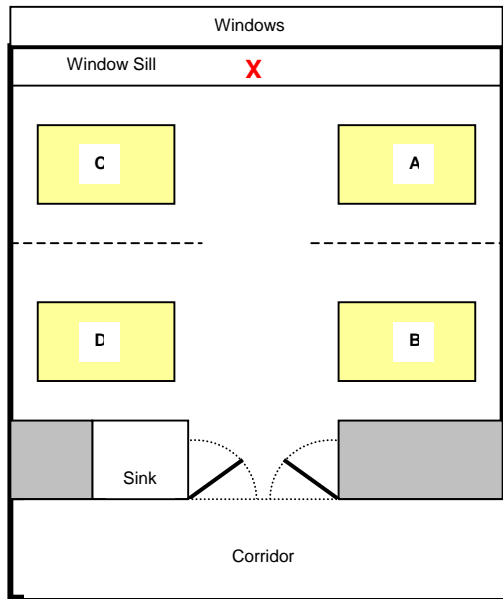

**b**

Supplement: MOESM1 [file 9449448]
